# Supplementary material for: DNA Methylome Analysis of Saturated Aliphatic Aldehydes in Pulmonary Toxicity
Source: PubMed Central journal article supplement (PMC6043580; doi:10.1038/s41598-018-28813-z), 2018-07-12
Supplement: 41598_2018_28813_MOESM1_ESM.pdf [file 41598_2018_28813_MOESM1_ESM.pdf]

## Supplementary Information

# **DNA Methylome Analysis of Saturated Aliphatic Aldehydes in Pulmonary Toxicity**

Yoon Cho<sup>1,2</sup>, Mi-Kyung Song<sup>3</sup>, Tae Sung Kim<sup>2</sup> and Jae-Chun Ryu<sup>1,4\*</sup>

<sup>1</sup> Cellular and Molecular Toxicology Laboratory, Center for Environment, Health and Welfare Research, Korea Institute of Science and Technology (KIST), 5, Hwarang-ro 14-gil, Seongbuk-gu, Seoul, 02792, Republic of Korea

<sup>2</sup> Department of Life Sciences, College of Life Sciences and Biotechnology, Korea University, 145 Anam-ro, Seongbuk-gu, Seoul, 02841, Republic of Korea

<sup>3</sup> National Center for Efficacy evaluation for Respiratory disease product, Jeonbuk Department of Inhalation Research, Korea Institute of Toxicology, 30 Baehak1-gil, Jeongeup, Jeollabuk-do, 53212, Republic of Korea

<sup>4</sup> Human and Environmental Toxicology, University of Science and Technology, 217, Gajeong-Ro, Yuseong-gu, Daejeon, 34113 Republic of Korea

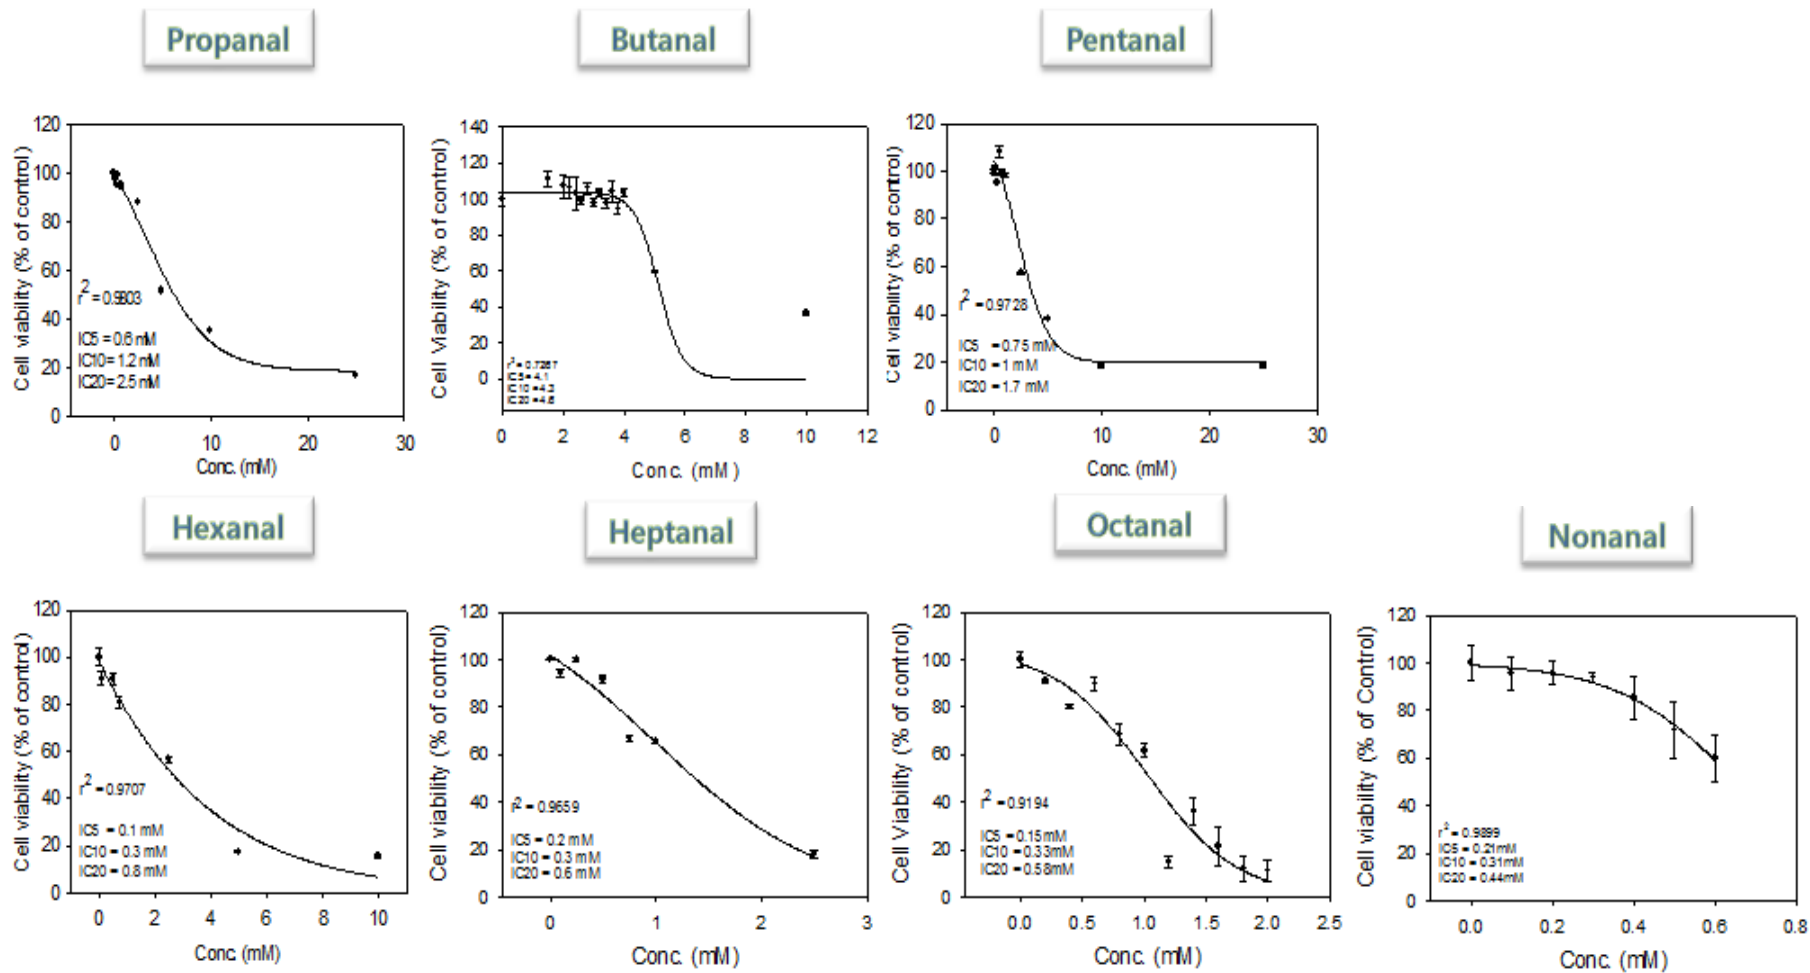

Figure 1. Cell viability of A549 cells exposed to the seven aldehydes using MTT assay.
